# Supplementary material for: Charge Storage Properties of Ferrimagnetic BaFe12O19 and Polypyrrole–BaFe12O19 Composites
Source: MDPI journal article supplement (doi:10.3390/molecules29091979), 2024-04-25
Supplement: s1 [file s1]

## Supplementary Information

Charge storage properties of ferromagnetic BaFe<sub>12</sub>O<sub>19</sub> and polypyrrole – BaFe<sub>12</sub>O<sub>19</sub> composites

Silin Chen and Igor Zhitomirsky\*

Department of Materials Science and Engineering, McMaster University,

1280 Main Street West, L8S 4L8, Hamilton, Ontario Canada

\*Email: [zhitom@mcmaster.ca](mailto:zhitom@mcmaster.ca)

Table S1. Capacitances, calculated from CV data.

| Electrode         | Capacitances $C_s$ (F cm <sup>-2</sup> ) / $C_m$ (F g <sup>-1</sup> ) at different sweep rates (mVs <sup>-1</sup> ) |                                                         |                                                         |                                                         |                                                         |                                                         |
|-------------------|---------------------------------------------------------------------------------------------------------------------|---------------------------------------------------------|---------------------------------------------------------|---------------------------------------------------------|---------------------------------------------------------|---------------------------------------------------------|
|                   | <b>2 mVs<sup>-1</sup></b>                                                                                           | <b>5 mVs<sup>-1</sup></b>                               | <b>10 mVs<sup>-1</sup></b>                              | <b>20 mVs<sup>-1</sup></b>                              | <b>50 mVs<sup>-1</sup></b>                              | <b>100 mVs<sup>-1</sup></b>                             |
|                   | $C_s$ (Fcm <sup>-2</sup> )<br>$C_m$ (Fg <sup>-1</sup> )                                                             | $C_s$ (Fcm <sup>-2</sup> )<br>$C_m$ (Fg <sup>-1</sup> ) | $C_s$ (Fcm <sup>-2</sup> )<br>$C_m$ (Fg <sup>-1</sup> ) | $C_s$ (Fcm <sup>-2</sup> )<br>$C_m$ (Fg <sup>-1</sup> ) | $C_s$ (Fcm <sup>-2</sup> )<br>$C_m$ (Fg <sup>-1</sup> ) | $C_s$ (Fcm <sup>-2</sup> )<br>$C_m$ (Fg <sup>-1</sup> ) |
| BFO-E             | 0.146<br>3.650                                                                                                      | 0.159<br>3.963                                          | 0.160<br>3.988                                          | 0.159<br>3.974                                          | 0.153<br>3.823                                          | 0.147<br>3.670                                          |
| HEBMBFO-E         | 1.00<br>24.88                                                                                                       | 0.91<br>22.90                                           | 0.83<br>20.80                                           | 0.73<br>18.35                                           | 0.58<br>14.55                                           | 0.44<br>11.05                                           |
| BFO-GCA-E         | 0.319<br>7.97                                                                                                       | 0.313<br>7.84                                           | 0.308<br>7.71                                           | 0.301<br>7.54                                           | 0.285<br>7.12                                           | 0.265<br>6.63                                           |
| HEBMBFO-GCA-E     | 1.34<br>33.51                                                                                                       | 1.27<br>31.73                                           | 1.19<br>29.82                                           | 1.10<br>27.49                                           | 0.94<br>23.52                                           | 0.75<br>18.69                                           |
| PPy-NTS-E         | 4.53<br>129.38                                                                                                      | 3.59<br>102.50                                          | 2.81<br>80.36                                           | 2.03<br>58.00                                           | 1.04<br>29.75                                           | 0.61<br>17.29                                           |
| PPy-PTS-E         | 4.66<br>133.26                                                                                                      | 4.17<br>119.03                                          | 3.66<br>104.48                                          | 3.03<br>86.47                                           | 1.97<br>56.32                                           | 1.18<br>33.65                                           |
| BFO-PPy-NTS-E     | 2.61<br>65.19                                                                                                       | 2.17<br>54.37                                           | 1.86<br>46.47                                           | 1.54<br>38.54                                           | 0.99<br>24.86                                           | 0.57<br>14.16                                           |
| BFO-PPy-PTS-E     | 2.82<br>70.45                                                                                                       | 2.74<br>68.43                                           | 2.62<br>65.62                                           | 2.42<br>60.52                                           | 1.88<br>46.93                                           | 1.26<br>31.38                                           |
| HEBMBFO-PPy-NTS-E | 3.39<br>84.71                                                                                                       | 3.00<br>75.03                                           | 2.68<br>67.11                                           | 2.38<br>59.48                                           | 1.78<br>44.60                                           | 1.09<br>27.27                                           |
| HEBMBFO-PPy-PTS-E | 3.21<br>80.26                                                                                                       | 3.01<br>75.36                                           | 2.75<br>68.76                                           | 2.30<br>57.55                                           | 1.35<br>33.72                                           | 0.70<br>17.55                                           |

Table S2. Capacitance calculated from CP data.

| Electrode         | Capacitances $C_s$ (F cm <sup>-2</sup> )/ $C_m$ (F g <sup>-1</sup> ) at different current density (mAcm <sup>-2</sup> ) |                                                                                       |                                                                                       |                                                                                        |
|-------------------|-------------------------------------------------------------------------------------------------------------------------|---------------------------------------------------------------------------------------|---------------------------------------------------------------------------------------|----------------------------------------------------------------------------------------|
|                   | <b>3 mAcm<sup>-2</sup></b><br>$C_s$ (Fcm <sup>-2</sup> )<br>$C_m$ (Fg <sup>-1</sup> )                                   | <b>5 mAcm<sup>-2</sup></b><br>$C_s$ (Fcm <sup>-2</sup> )<br>$C_m$ (Fg <sup>-1</sup> ) | <b>7 mAcm<sup>-2</sup></b><br>$C_s$ (Fcm <sup>-2</sup> )<br>$C_m$ (Fg <sup>-1</sup> ) | <b>10 mAcm<sup>-2</sup></b><br>$C_s$ (Fcm <sup>-2</sup> )<br>$C_m$ (Fg <sup>-1</sup> ) |
| BFO-E             | 0.16<br>3.99                                                                                                            | 0.15<br>3.70                                                                          | 0.14<br>3.48                                                                          | 0.13<br>3.18                                                                           |
| HEBMBFO-E         | 1.08<br>27.03                                                                                                           | 0.97<br>24.31                                                                         | 0.90<br>22.50                                                                         | 0.83<br>20.78                                                                          |
| BFO-GCA-E         | 0.30<br>7.57                                                                                                            | 0.29<br>7.33                                                                          | 0.28<br>7.14                                                                          | 0.27<br>6.87                                                                           |
| HEBMBFO-GCA-E     | 1.43<br>35.85                                                                                                           | 1.33<br>33.34                                                                         | 1.26<br>31.52                                                                         | 1.19<br>29.83                                                                          |
| PPy-NTS-E         | 4.18<br>119.35                                                                                                          | 3.81<br>108.88                                                                        | 3.61<br>103.24                                                                        | 3.35<br>95.60                                                                          |
| PPy-PTS-E         | 4.30<br>122.87                                                                                                          | 4.23<br>120.83                                                                        | 3.77<br>107.83                                                                        | 3.33<br>95.17                                                                          |
| BFO-PPy-NTS-E     | 2.65<br>66.37                                                                                                           | 2.53<br>63.30                                                                         | 2.45<br>61.21                                                                         | 2.35<br>58.79                                                                          |
| BFO-PPy-PTS-E     | 3.02<br>75.50                                                                                                           | 2.55<br>63.65                                                                         | 2.48<br>61.93                                                                         | 2.44<br>61.12                                                                          |
| HEBMBFO-PPy-NTS-E | 3.70<br>92.56                                                                                                           | 3.55<br>88.85                                                                         | 3.46<br>86.60                                                                         | 3.35<br>83.65                                                                          |
| HEBMBFO-PPy-PTS-E | 3.28<br>82.08                                                                                                           | 3.20<br>80.10                                                                         | 3.16<br>79.04                                                                         | 3.12<br>78.07                                                                          |

Table S3. EIS data for different electrodes

| Electrode         | Z' at 10 mHz<br>Ohm | C' at 10 mHz<br>F cm <sup>-2</sup> |
|-------------------|---------------------|------------------------------------|
| BFO-E             | 47.90               | 0.033                              |
| HEBMBFO-E         | 113.95              | 0.061                              |
| BFO-GCA-E         | 13.86               | 0.124                              |
| HEBMBFO-GCA-E     | 65.41               | 0.117                              |
| PPy-NTS-E         | 2.33                | 2.55                               |
| PPy-PTS-E         | 1.36                | 2.89                               |
| BFO-PPy-NTS-E     | 2.51                | 1.62                               |
| BFO-PPy-PTS-E     | 1.40                | 2.08                               |
| HEBMBFO-PPy-NTS-E | 1.56                | 2.09                               |
| HEBMBFO-PPy-PTS-E | 2.01                | 1.88                               |

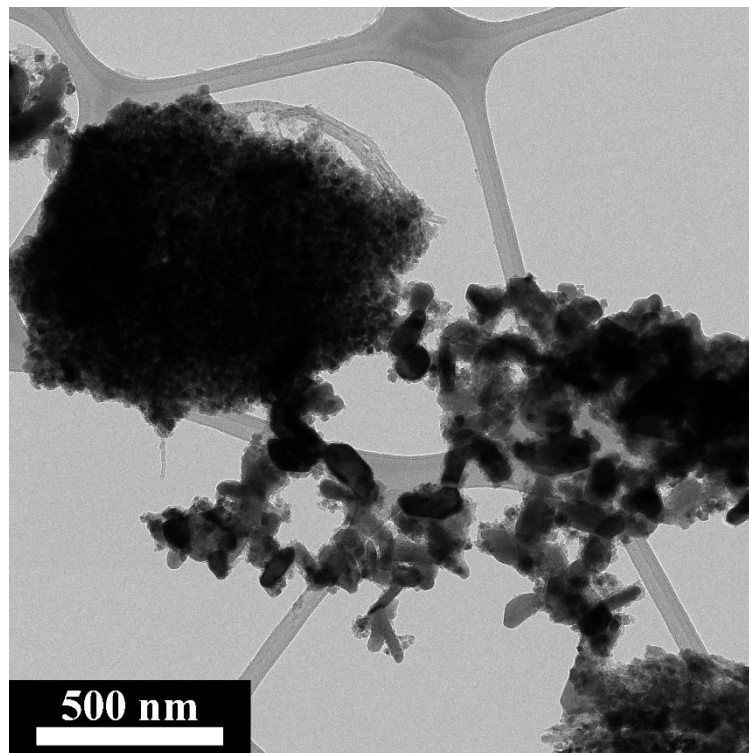

Figure S1. TEM image of as-received BFO obtained using TALOS L102C microscope (Thermo Fisher Scientific)

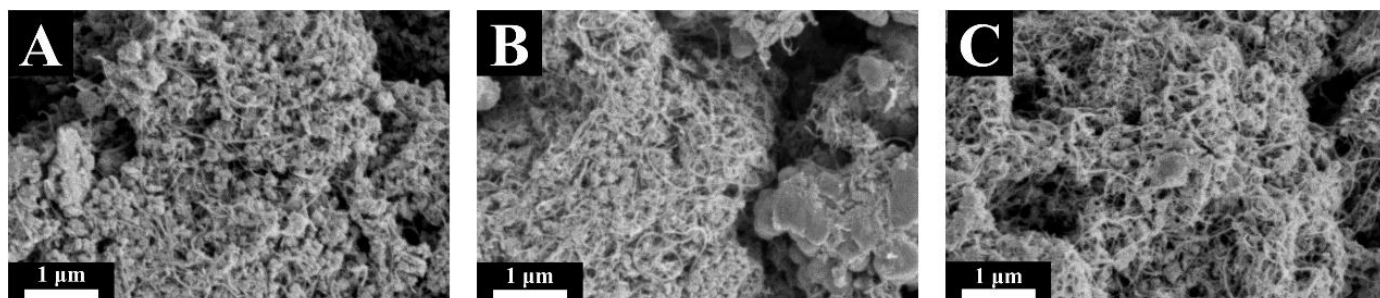

Figure S2. SEM images of (A) HEBMBFO-GCA-E, (B) HEBMBFO-PPy-NTS-E, and (C) HEBMBFO-PPy-PTS-E, obtained using Apreo 2 S LoVac microscope (Thermo Fisher Scientific)

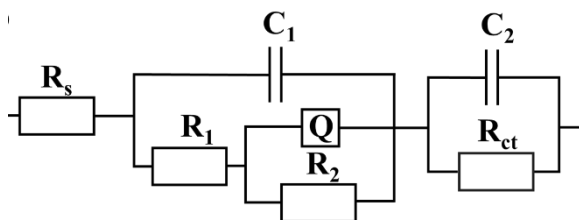

Figure S3. Equivalent circuit used for EIS data simulation[1]

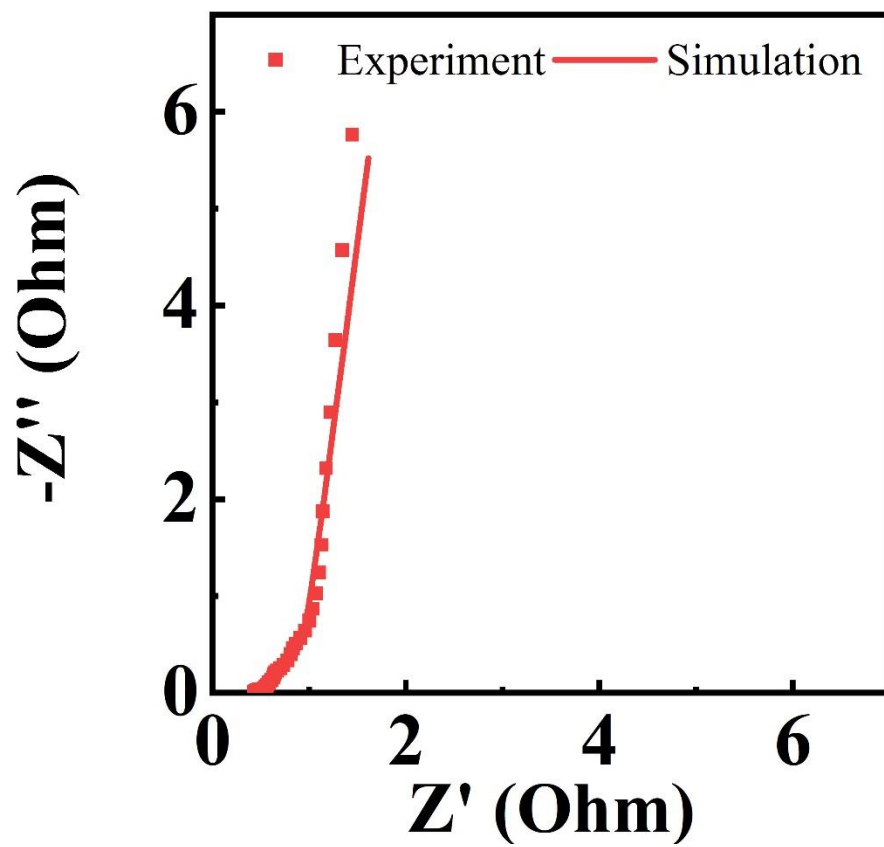

Figure S4. EIS data for HEBMBFO-PPy-NTS-E.

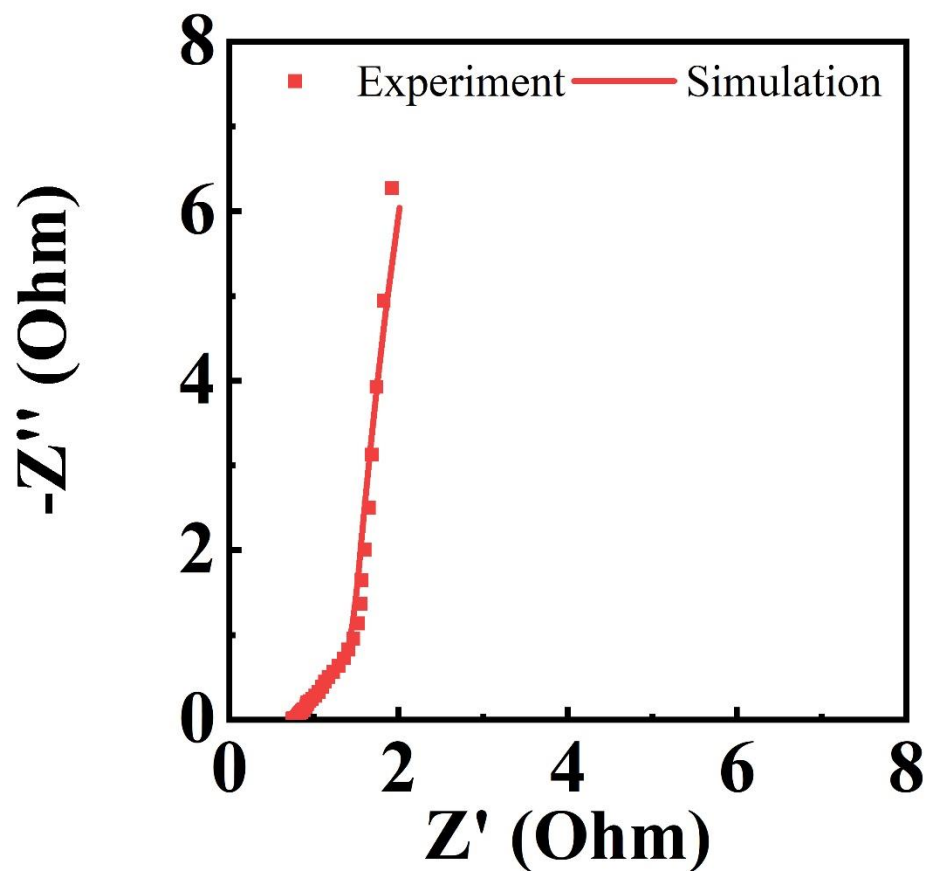

Figure S5. EIS data for HEBMBFO-PPy-PTS-E

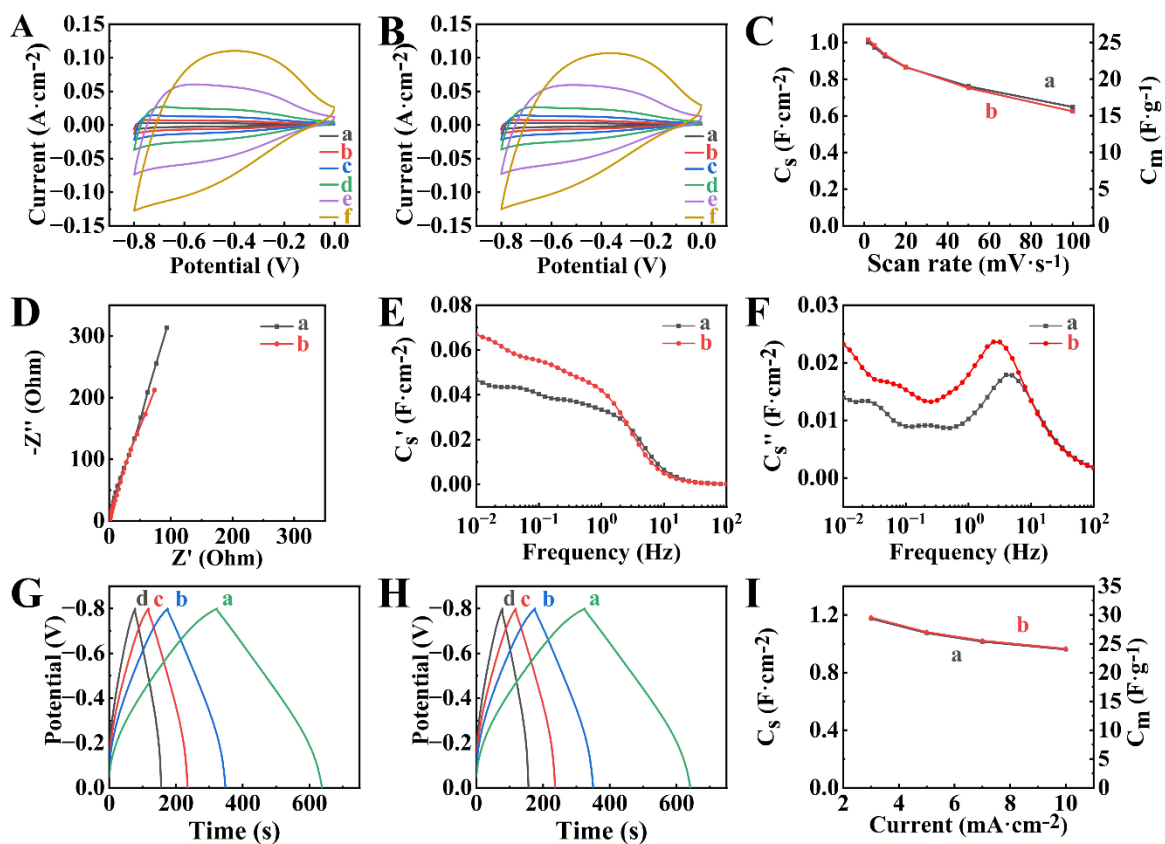

Figure S6. (A, B) CVs at sweep rates of (a) 2, (b) 5, (c) 10, (d) 20, (e) 50, and (f) 100  $\text{mV} \cdot \text{s}^{-1}$ , (C) capacitance calculated from CVs versus sweep rate, (D-F) EIS data, (G, H) CP data at current densities of (a) 3, (b) 5, (c) 7, and (d) 10  $\text{mA} \cdot \text{cm}^{-2}$  and (I) capacitance calculated from CP data versus current density for (A), (C(a)), (D(a)), (E(a)), (F(a)), (G), I(a) HEBM-BFO-NTS-E and (B), (C(b)), (D(b)), (E(b)), (F(b)). (H), I(b) HEBM-BFO-PTS-E.



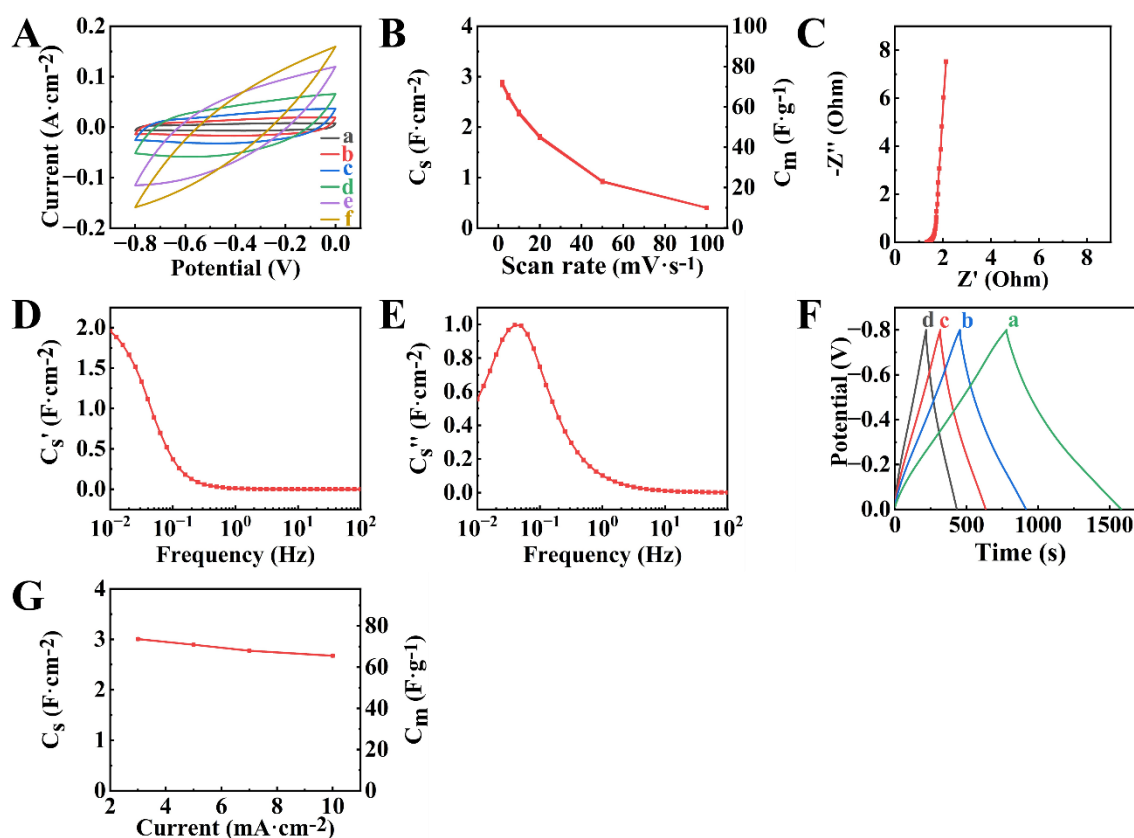

Figure S7 (A) CVs at sweep rates of (a) 2, (b) 5, (c) 10, (d) 20, (e) 50, and (f) 100  $\text{mV s}^{-1}$ , (B) capacitance calculated from CVs versus sweep rate, (C-E) EIS data, (F) CP data at current densities of (a) 3, (b) 5, (c) 7, and (d) 10  $\text{mA cm}^{-2}$  and (G) capacitance calculated from CP data versus current density for HEBM BFO-PPy-GCA-E.
